# Supplementary material
Source: Research Square preprint supplement (doi:10.21203/rs.3.rs-9646573/v1)
Supplement: Supplementary file 1 [file 06a442f23bd4af7dd67e67c5.docx]

***Winners wave wings: courtship display increases mating success in* Rhagoletis juglandis *(Diptera: Tephritidae)***

*Journal of Insect Biology*

Sophia C. Anner1, Marlee Mincher1, and Alycia C. R. Lackey1

1 Department of Biology, University of Louisville, Louisville, KY

Corresponding author: Sophia C. Anner ([sophia.anner@louisville.edu](mailto:sophia.anner@louisville.edu))

***Supp. Table 1:*** AIC results for generalized linear models with binomial distribution with and without trimming copulation durations under 10 minutes. “Outcome” is copulation success and “restricted” is a yes/no variable.

| *model name* | *# trials* | *model structure* | *K* | *AICc* | *∆AICc* | *AICc weight* |
| --- | --- | --- | --- | --- | --- | --- |
| Trimmed (only trials with copulation duration >10 min) | 24 | outcome ~ restricted | 2 | 62.22 | 0 | 0.99 |
| Full (all trials) | 29 | outcome ~ restricted | 2 | 72.54 | 10.33 | 0.01 |


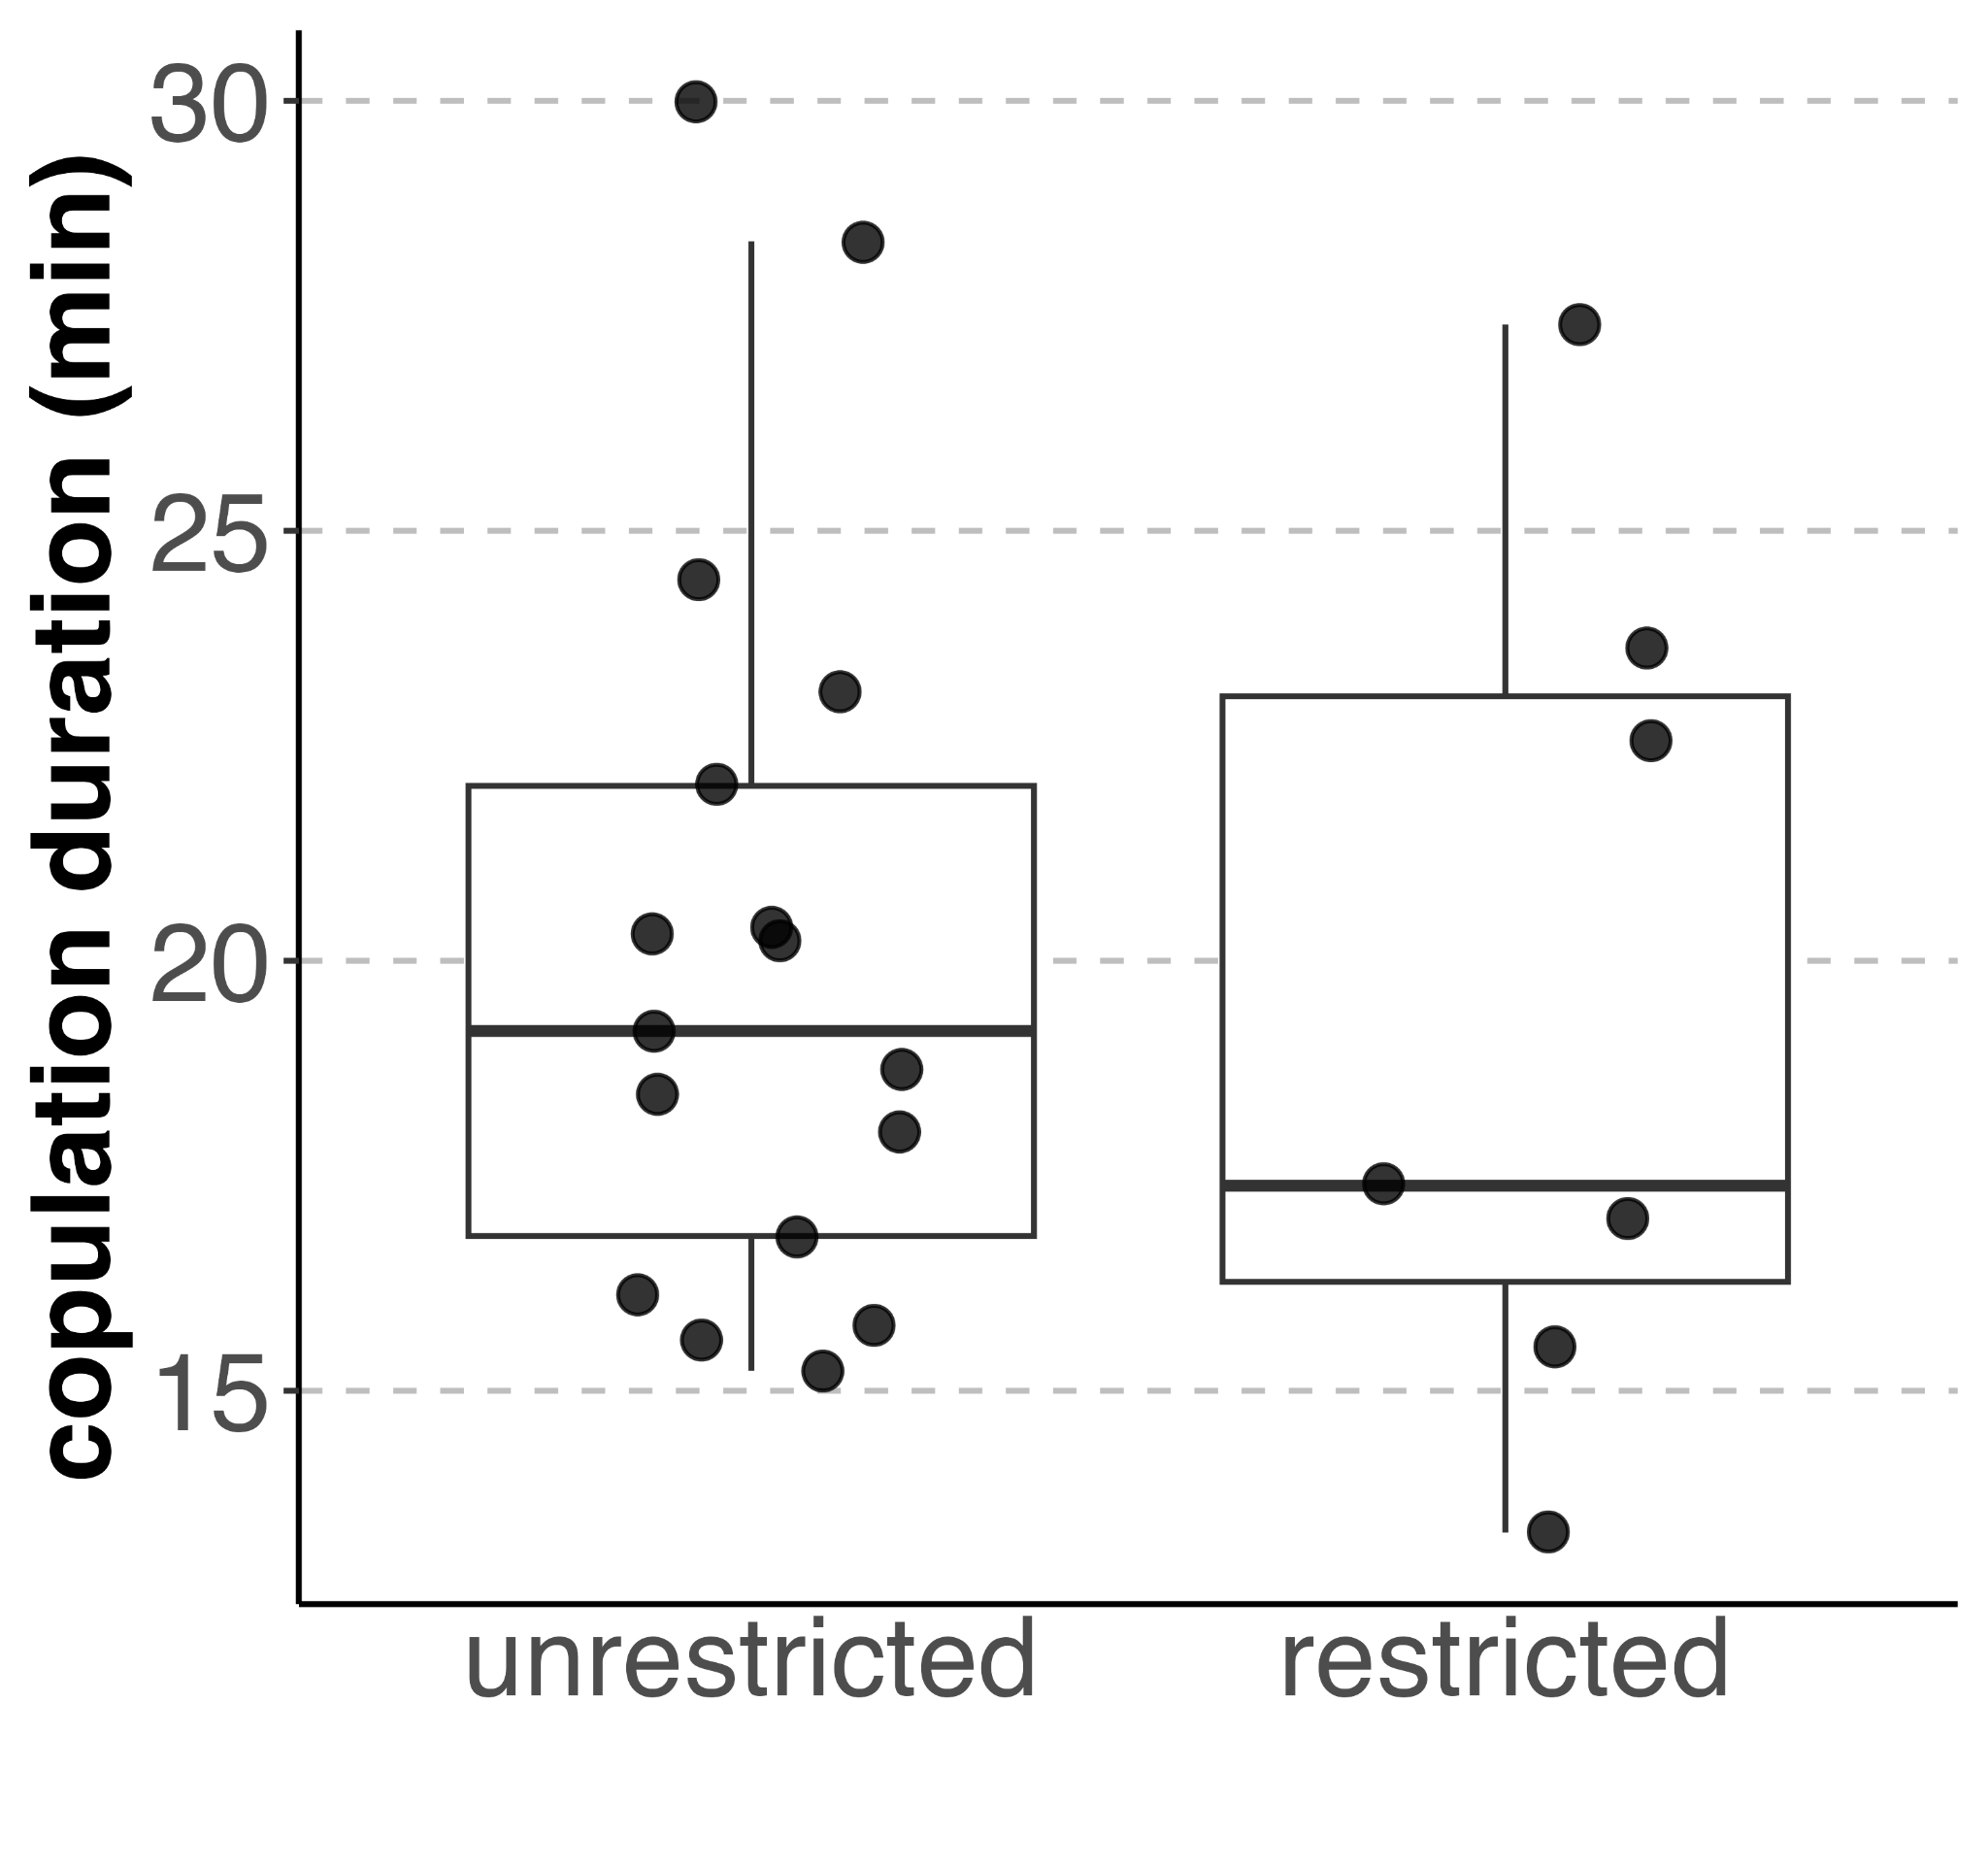


**Supp. Fig. 1** Boxplots of copulation duration for trials in which successful males were restricted and unable to perform the wing display or unrestricted. Points are data for individual trials.

**ESM 2** Video excerpt from trial where unrestricted male successfully copulates. Copulation at 56 seconds.

**ESM 3** Video excerpt from trial where restricted male successfully copulates. Copulation at 42 seconds.
